# Supplementary material
Source: publisher figshare collection journal article supplement (https://diabetesjournals.figshare.com/articles/dataset/_/17185898)
Supplement: Supplementary file 3 [file 1]

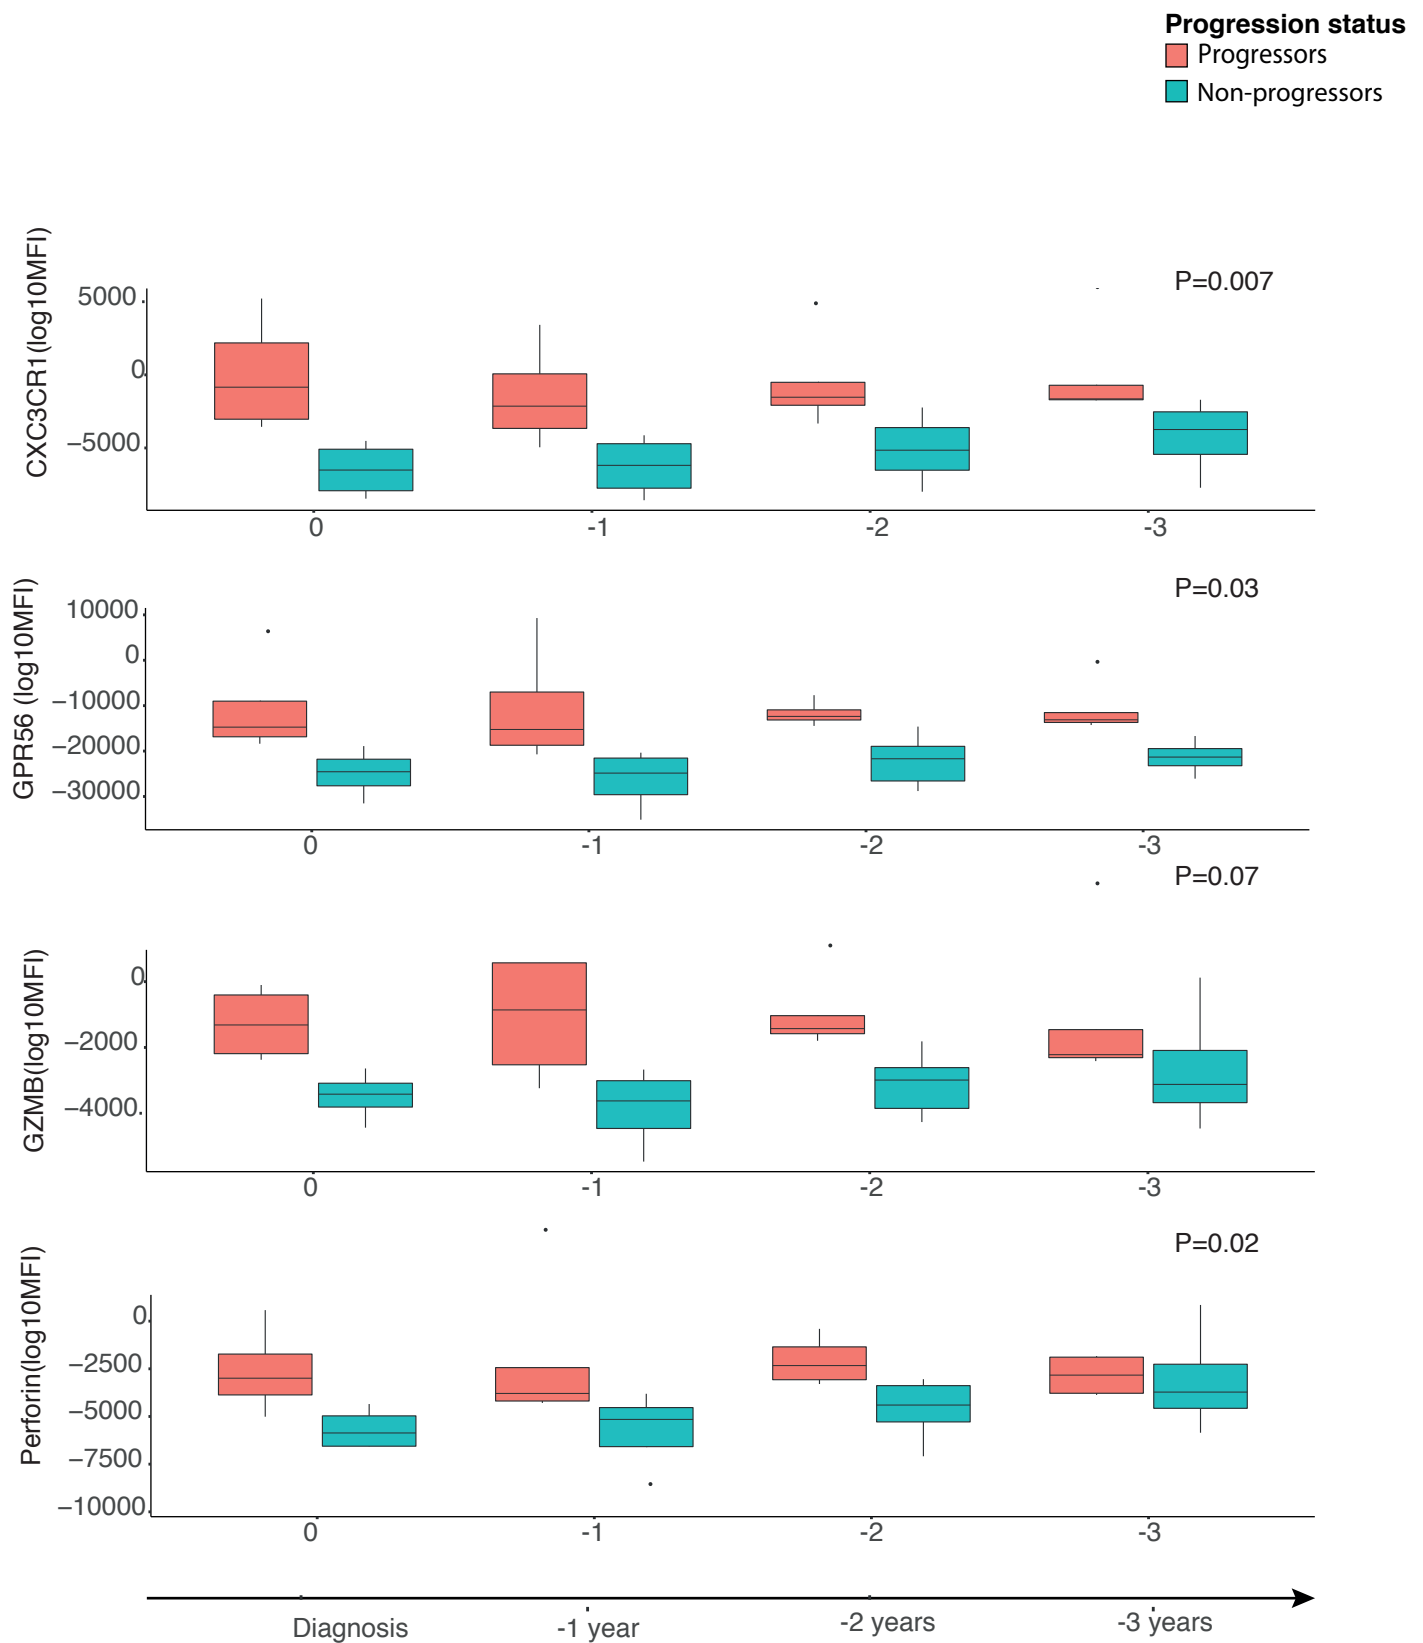

**Figure S3. Expression of cytotoxic-related genes in the TEMRA CD4<sup>+</sup> T cells in progressors and non-progressors.** Boxplots showing corrected (by age and batch) mean fluorescence intensity (MFI) of cytotoxicity-related proteins by flow cytometry in TEMRA (CD45RA<sup>+</sup>, CCR7<sup>-</sup>) CD4<sup>+</sup> T cells from five progressors and five non-progressors across time. The x-axis shows time intervals measured in years from time 0 (clinical T1D in Progressors). Shown are the median (central horizontal line), interquartile range (boxes), values of the upper and lower quartiles (whiskers), outliers beyond 1.5 IQR (circles). Statistical comparisons were performed using linear mixed models that included the ProgressorStatus \* timePoint interaction term and were adjusted for age, batch and donorID as a random factor.
