# Supplementary material
Source: publisher figshare collection journal article supplement (https://diabetesjournals.figshare.com/articles/dataset/_/17185898)
Supplement: Supplementary file 4 [file 1]

# TEMRA-enriched signature

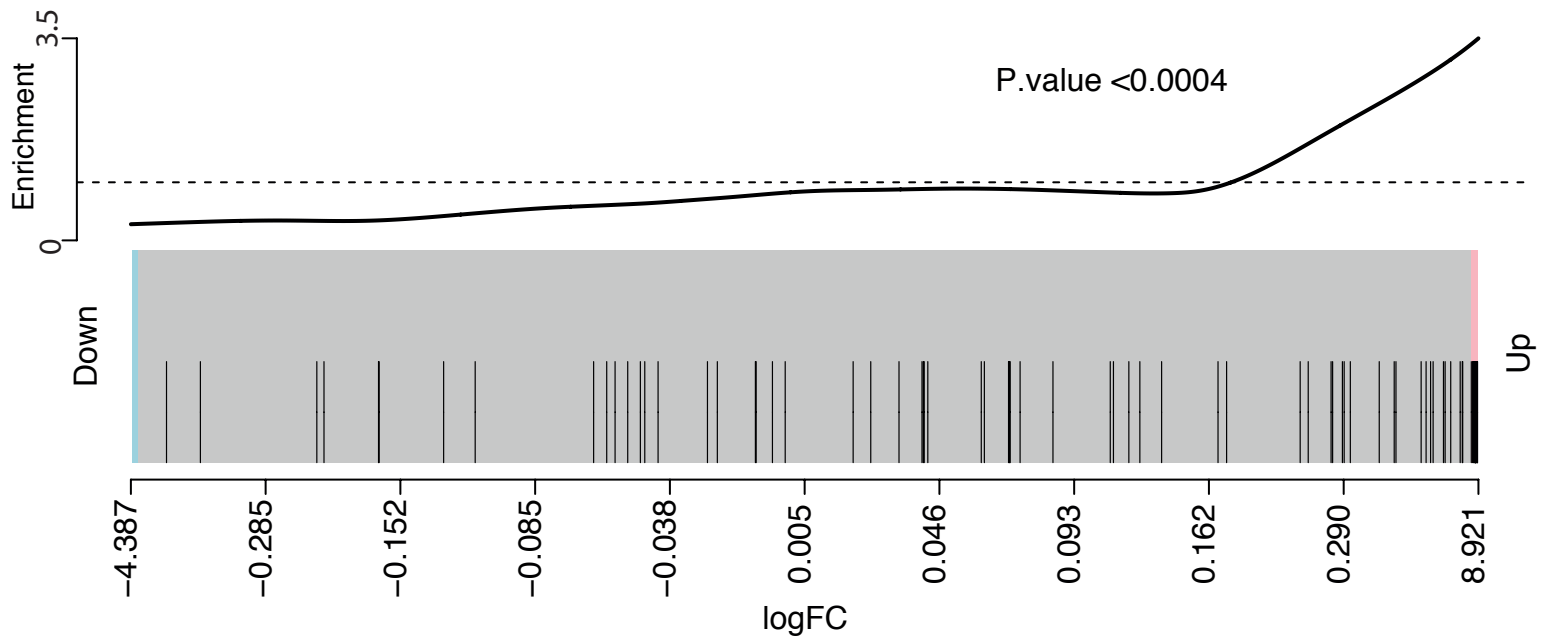

**Figure S1. Enrichment of progression-associated differentially expressed genes for the CD4<sup>+</sup> TEMRA-like signature.** Barcode enrichment plot showing correlation of the progression-associated gene expression signature with the CD4<sup>+</sup> TEMRA-like signature. Regions are ordered on the plot from right to left from most positive logFC to most negative when comparing progressors to non-progressors (x axis). Vertical bars indicate regions increased in CD4<sup>+</sup> TEMRA cells in comparison with other T cell memory subtypes. Enrichment was assessed by fry gene set tests.
